# Supplementary material for: Biomimetic triphasic silk fibroin scaffolds seeded with tendon-derived stem cells for tendon-bone junction regeneration
Source: Royal Society of Chemistry journal article supplement (doi:10.1039/d3bm00548h), 2023-12-19
Supplement: d3bm00548h1.pdf [file d3bm00548h1.pdf]

## **Supplemental information**

Biomimetic Triphasic Silk Fibroin Scaffold Seeded with  
Tendon-Derived Stem Cells for Tendon-Bone Junction  
Regeneration

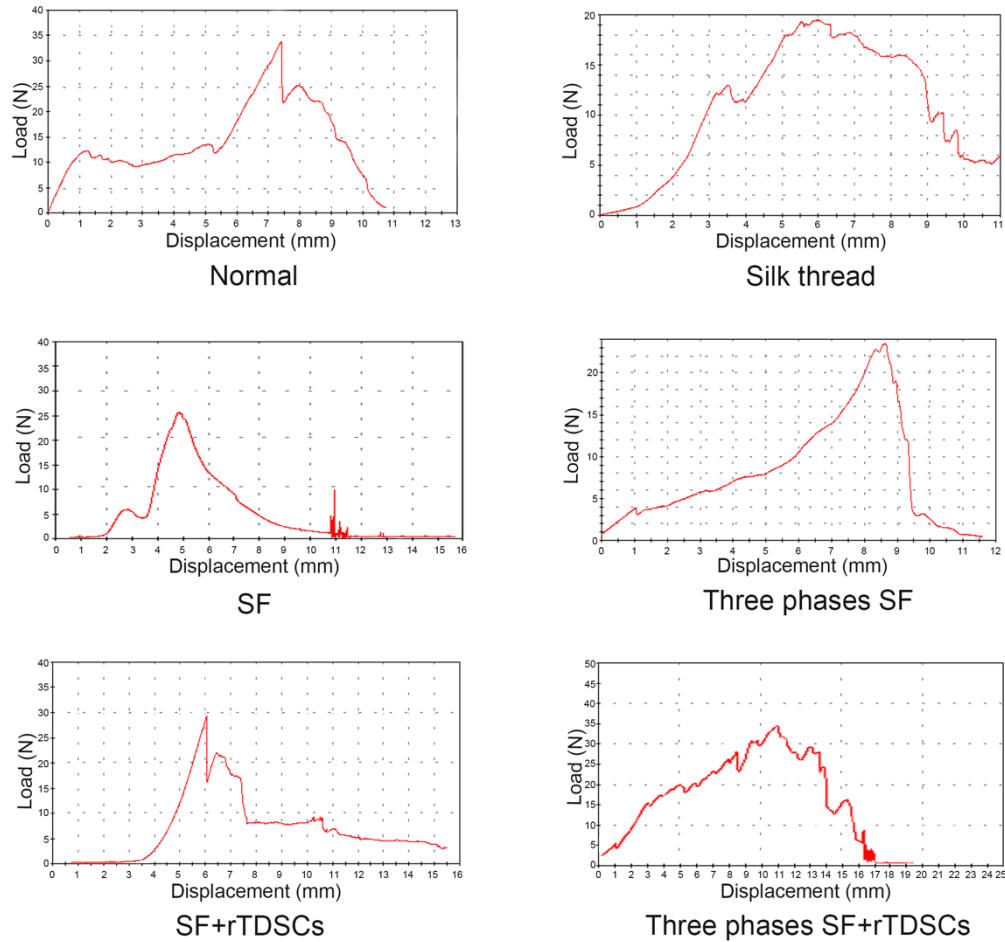

Fig S1. Tensile test of the rat patellar TBJ at 8 weeks after surgery. Note: 3 samples in every group were tested and the representative results were showed.

Table S1. Sequences of the primers used in qRT-PCR

| Gene                            | Forward primer             | Reverse primer            |
|---------------------------------|----------------------------|---------------------------|
| Runx2                           | CGGAGCGGACGAGGCAAGAG       | AGAGTCATCAAGCTTCTGTCTGTGC |
| Spp1(Secreted phosphoprotein 1) | CCAAGCGTGGAAACACACAGCC     | GGCTTTGGAAGCTCGCCTGACTG   |
| Sox9                            | CGTCAACGGCTCCAGCA          | TGCGCCCACACCATGA          |
| Col2a1                          | CCGGACTGTGAGGTTAGGAT       | AACCCAAAGGACCCAAATAC      |
| Tnmd (Tenomodulin)              | GTGGTCCCACAAGTGAAGGT       | GTCTTCTCGCTTGCTTGTC       |
| Scx (Scleraxis)                 | AACACGGCCTTCACTGCGCTG      | CAGTAGCACGTTGCCAGGTG      |
| TenC (TenascinC)                | CAGAAGCTGAACCGGAAGTTG      | GGCTGTTGTTGCTATGGCACT     |
| GAPDH                           | CTCAACTACATGGTCTACATGTTCCA | CTCCCAATTCTCAGCCTTGACT    |
